# Supplementary material for: Phase-driven charge manipulation in Hybrid Single-Electron Transistor
Source: PubMed Central journal article supplement (PMC5647419; doi:10.1038/s41598-017-13894-z), 2017-10-18
Supplement: 41598_2017_13894_MOESM1_ESM.pdf [file 41598_2017_13894_MOESM1_ESM.pdf]

## Supplementary Information

### Phase-driven charge manipulation in Hybrid Single-Electron Transistor

Emanuele Enrico, Elia Strambini, Francesco Giazotto

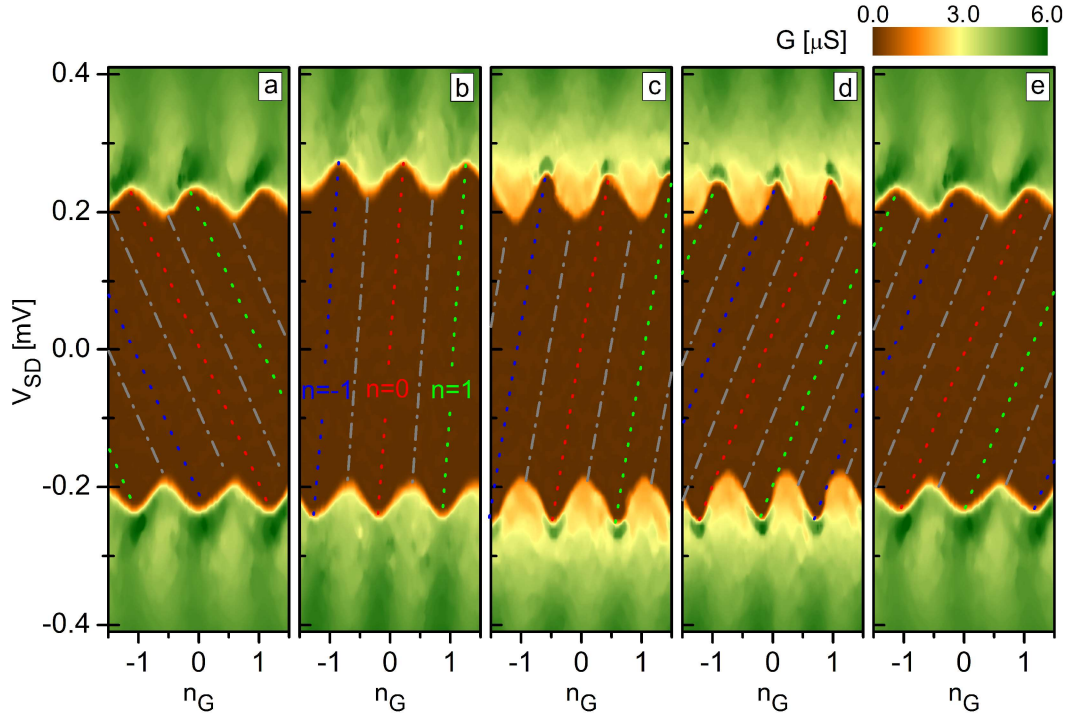

**Supplementary Figure S1. Stability diagrams under turnstile behavior**

**a-e**, stability diagrams showing the measured differential conductance ( $G = \partial I_{SD} / \partial V_{SD}$ ). Gray dash-dotted lines correspond to blocked regions having fixed island charge configuration ( $n$  in **b**). RGB lines (corresponding to energy configurations in Fig.3 **a-c** of the manuscript) are guidelines for different charge states (expanded diamonds). **a-e** have been measured for  $\Phi_B = 0.359 \Phi_0$ ,  $\Phi_B = 0.393 \Phi_0$ ,  $\Phi_B = 0.428 \Phi_0$ ,  $\Phi_B = 0.463 \Phi_0$  and  $\Phi_B = 0.5 \Phi_0$  respectively. In **b** the superconducting gaps of both source and drain electrodes are almost fully open while in **a** (and **e**) they are in the antiphase case being the first open and the second closed (vice versa in **e**). All measurements were taken at 21 mK of bath temperature.
